# Supplementary material for: Surfacial ligand management of a perovskite film for efficient and stable light-emitting diodes
Source: Royal Society of Chemistry journal article supplement (doi:10.1039/c9tc05037j), 2019-01-01
Supplement: c9tc05037j1.pdf [file c9tc05037j1.pdf]

## Supporting Information

### Surfacial Ligand Management of Perovskite Film for Efficient and Stable Light-Emitting Diodes

*Wan-Shan Shen<sup>a</sup>, Shuai Yuan<sup>a</sup>, Qi-Sheng Tian<sup>a</sup>, Yi-Chen Tao<sup>a</sup>, Qiang Wang<sup>a</sup> and Liang-Sheng Liao<sup>\*ab</sup>*

a. Institute of Functional Nano & Soft Materials (FUNSOM), Jiangsu Key Laboratory for Carbon-Based Functional Materials & Devices, Soochow University, Suzhou, Jiangsu 215123, China. E-mail: lsiao@suda.edu.cn

b. Institute of Organic Optoelectronics, Jiangsu Industrial Technology Research Institute (JITRI), 1198 Fenu Dadao, Wujiang, Suzhou, Jiangsu, 215211, P. R. China.

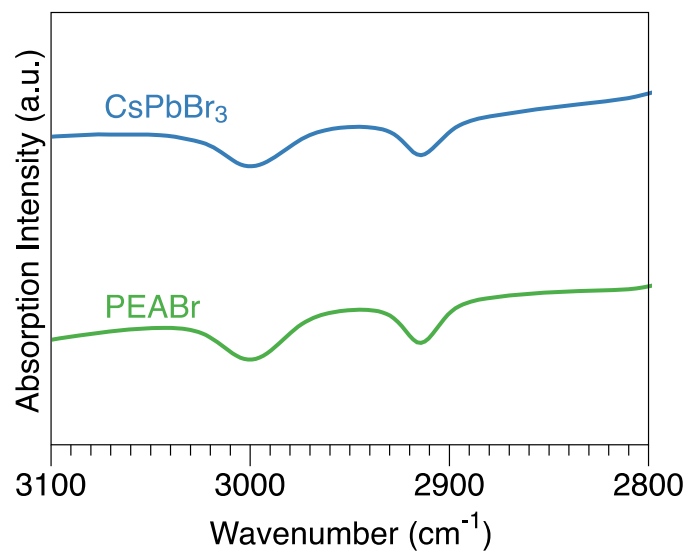

**Figure S1.** FTIR spectra of pristine CsPbBr<sub>3</sub> film and PEABr film.

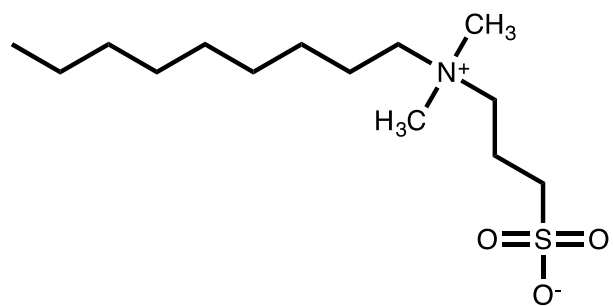

**Figure S2.** Structure of C<sub>15</sub>H<sub>33</sub>NO<sub>3</sub>S (N-Decyl-N, N-dimethyl-3-ammonio-1-propanesulfonate).

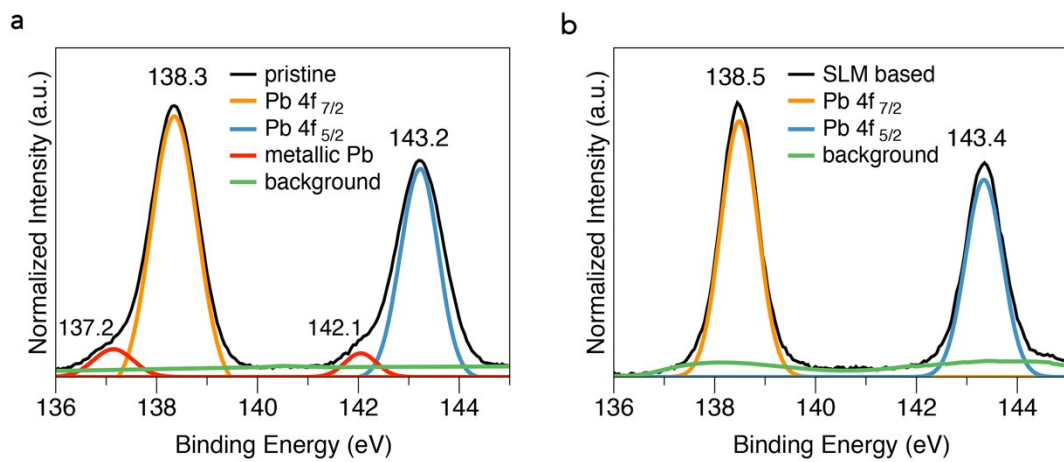

**Figure S3.** XPS spectra of (a) the pristine perovskite and (b) the SLM based perovskite film.

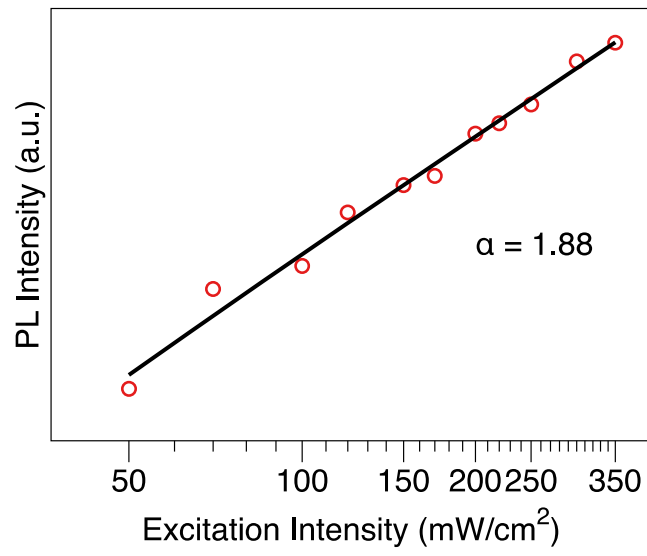

**Figure S4.** Power-dependent spectra of the SLM based perovskite film on a double logarithmic scale.

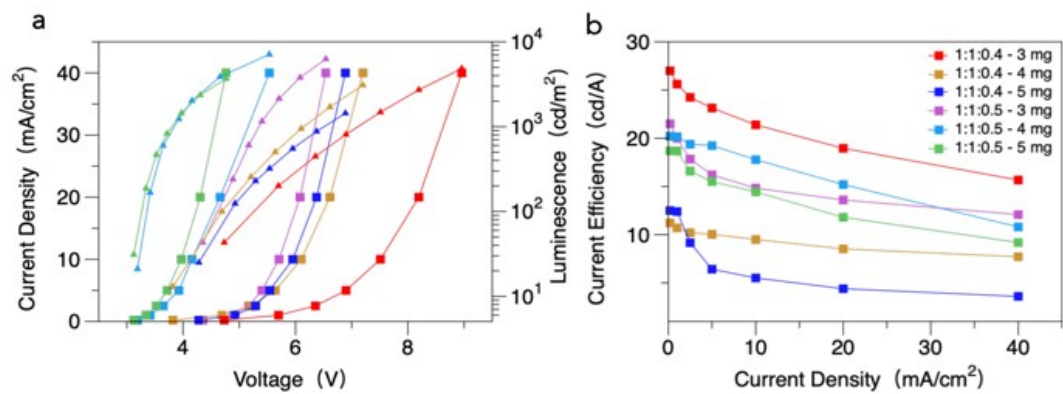

**Figure S5.** (a) J-V-L curves and (b) CE-J curves of PeLEDs with different concentration ratios.

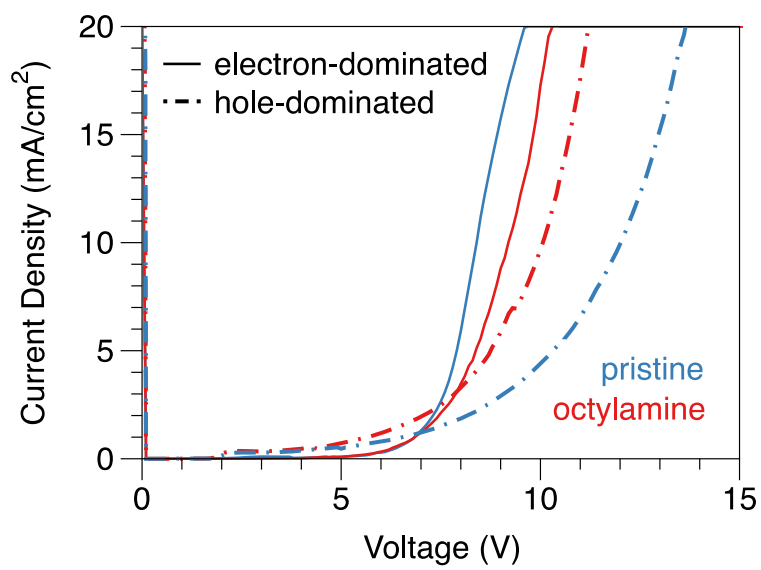

**Figure S6.** J-V curves of hole/electron-dominated devices with/without octylamine treatment.

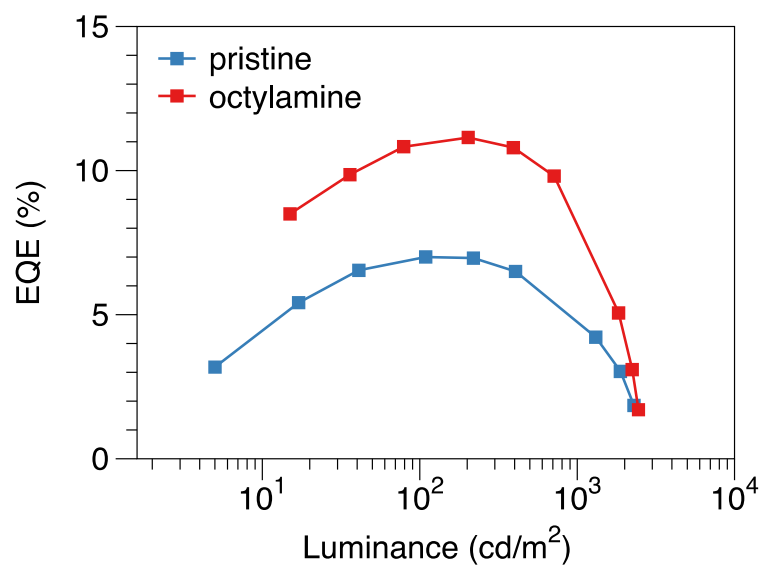

**Figure S7.** EQE of pristine PeLEDs and SLM based PeLEDs.



$$\tau_{average} = \frac{1}{k_r + k_{nr}}$$

$$PLQY = \frac{k_r}{k_r + k_{nr}}$$

$$k_{nr} = \frac{1 - PLQY}{\tau_{average}}$$

**Equation S1.** Calculation of non-radiative recombination rate.
